# Supplementary material
Source: PubMed Central journal article supplement (PMC3526682)

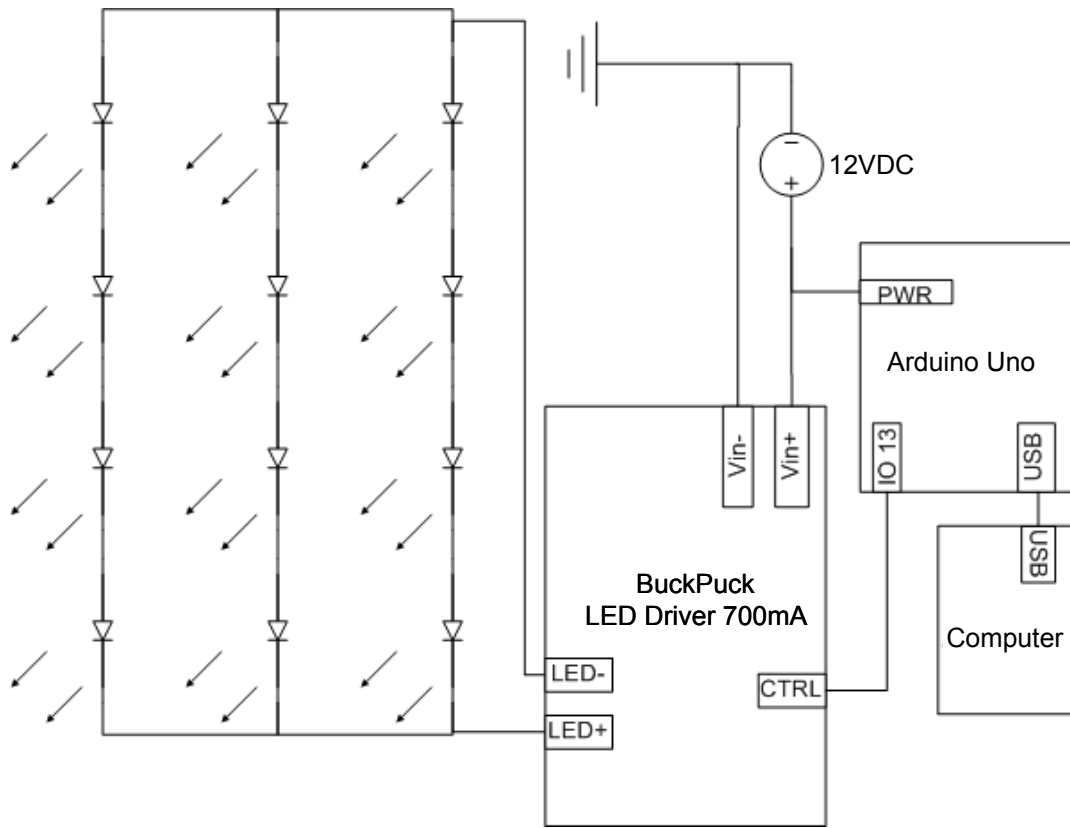

Supplemental Figure 2. Diagram of blue LED control circuit.

Supplement: NIHMS404990-supplement-02.pdf [file NIHMS404990-supplement-02.pdf]
